# Supplementary material
Source: PubMed Central journal article supplement (PMC2701690)
Supplement: NIHMS38702-supplement-01.pdf [file NIHMS38702-supplement-01.pdf]

# **Intramolecular thermal allenyne [2 + 2] cycloadditions; facile construction of the 5-6-4 ring core of sterpurene**

Timo V. Ovaska and Robert E. Kyne

*Department of Chemistry, Connecticut College, 270 Mohegan Avenue, New London, CT 06320, USA*

## **Supporting Information**

### **Contents**

Copies of  $^1\text{H}$  and  $^{13}\text{C}$  NMR spectra of compounds **4a-d** and **5b-d** (S-2 – S-23)

$^1\text{H}$ ,  $^{13}\text{C}$  NMR data and HRMS data for compounds **4a-d** and **5b-d** (S-24 – S-25)

Archive directory: /export/home/TW01ab/vnarsys/data  
Sample directory: tw0817\_17jun2004

Pulse Sequence: szpul

Solvent: CDCl3  
Temp: 29.0 C / 295.1 K  
File: szpul  
INSTR: 500 NMR500"

Relax: delay 1.000 sec  
Pulse: 45.0 degrees  
Acq: 196.1092 sec  
# repetitions: 8  
OBSERVE HI: 499.7383624  
DATA PROCESSING  
FT size 32768  
Total time 0 min, 29 sec

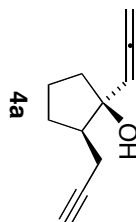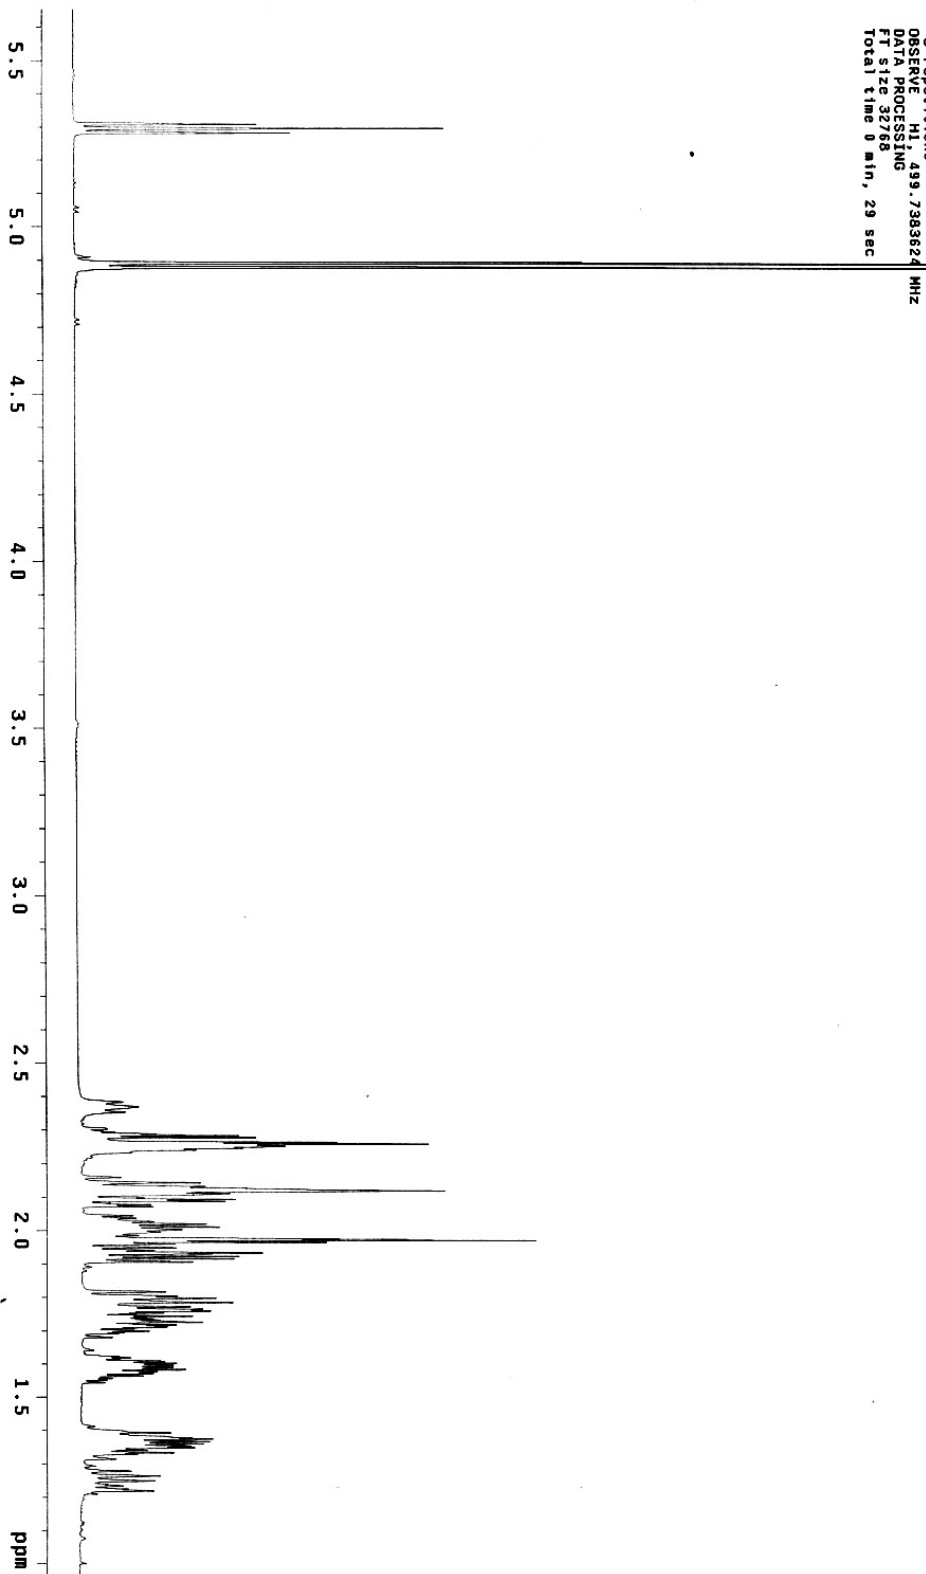

Archive directory: /export/home/TVDlab/vnmrsys/data  
Sample directory: tv0817\_17jun2004  
File: CARBON

4a

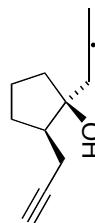

Pulse Sequence: szpul  
Solvent: CDCl3  
Temp: 22.0 C / 295.1 K  
User: 1-14-87  
INOVA-500 "NMR500"

Relax. delay 1.000 sec  
Pulse 45.0 degrees  
Acq. time 1.300 sec  
Width 31409.5 Hz  
128 repetitions  
OBSERVE C13, 125.6592773 MHz  
DECUPLE H1, 499.7408456 MHz  
Power 40 dB  
continuously on  
GARP-1 modulated  
DATA PROCESSING  
Line broadening 0.5 Hz  
FT size 131072  
Total time 19 min, 46 sec

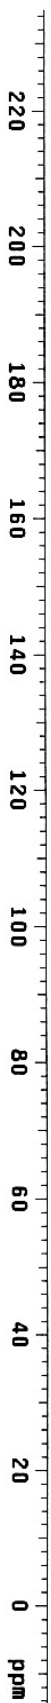

Archive directory: /export/home/TV01ab/vmrsys/data  
 Sample directory: tv00509\_09Jun2004  
 Pulse Sequence: s2pul  
 Solvent: CDCl3  
 Temp: 22.0 C / 295.1 K  
 File: PROTON  
 INOVA-500 "NMR500"  
 Relax. delay 1.000 sec  
 Pulse 45.0 degrees  
 Acq. 1.0842 sec  
 Vd1: 295.0 Hz  
 8 repetitions  
 OBSERVE H1 499.783624 MHz  
 DATA PROCESSING  
 FT size 32768  
 Total time 0 min, 29 sec

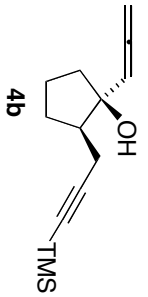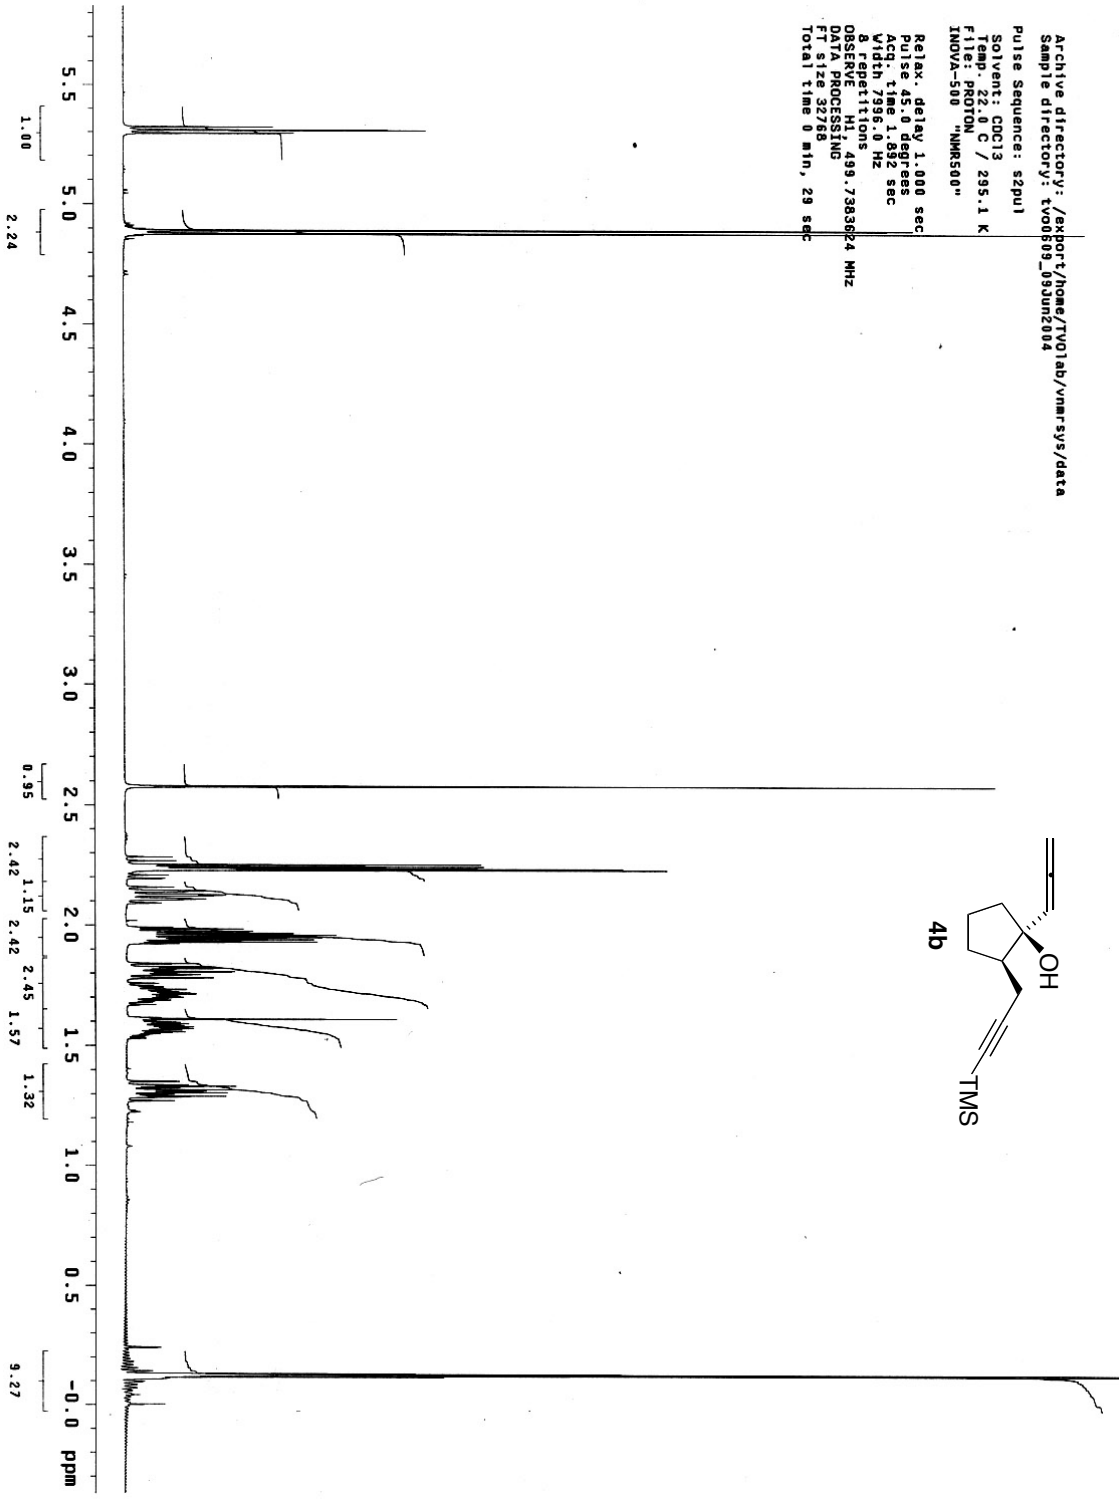

Archive directory: /export/home/TVO1lab/vnmrSYS/data  
Sample directory: tv08503\_09jun2004  
File: CARBON  
Pulse Sequence: s2pu1  
Solvent: CDCl3  
Temp: 22.0 C / 295.1 K  
User: 1-14-87  
INOVA-500 "NMR500"

Relax. delay 1.000 sec  
Pulse 45.0 degrees  
Acq. time 1.300 sec  
Width 31409.5 Hz  
132 repetitions  
OBSERVE C13, 125.6593101 MHz  
DECOUPLE H1, 499.7408456 MHz  
Power 40 db  
continuously on  
GARP-1 modulated  
DATA PROCESSING  
Line broadening 0.5 Hz  
FT size 131072  
Total time 19 min, 46 sec

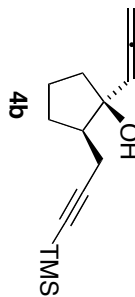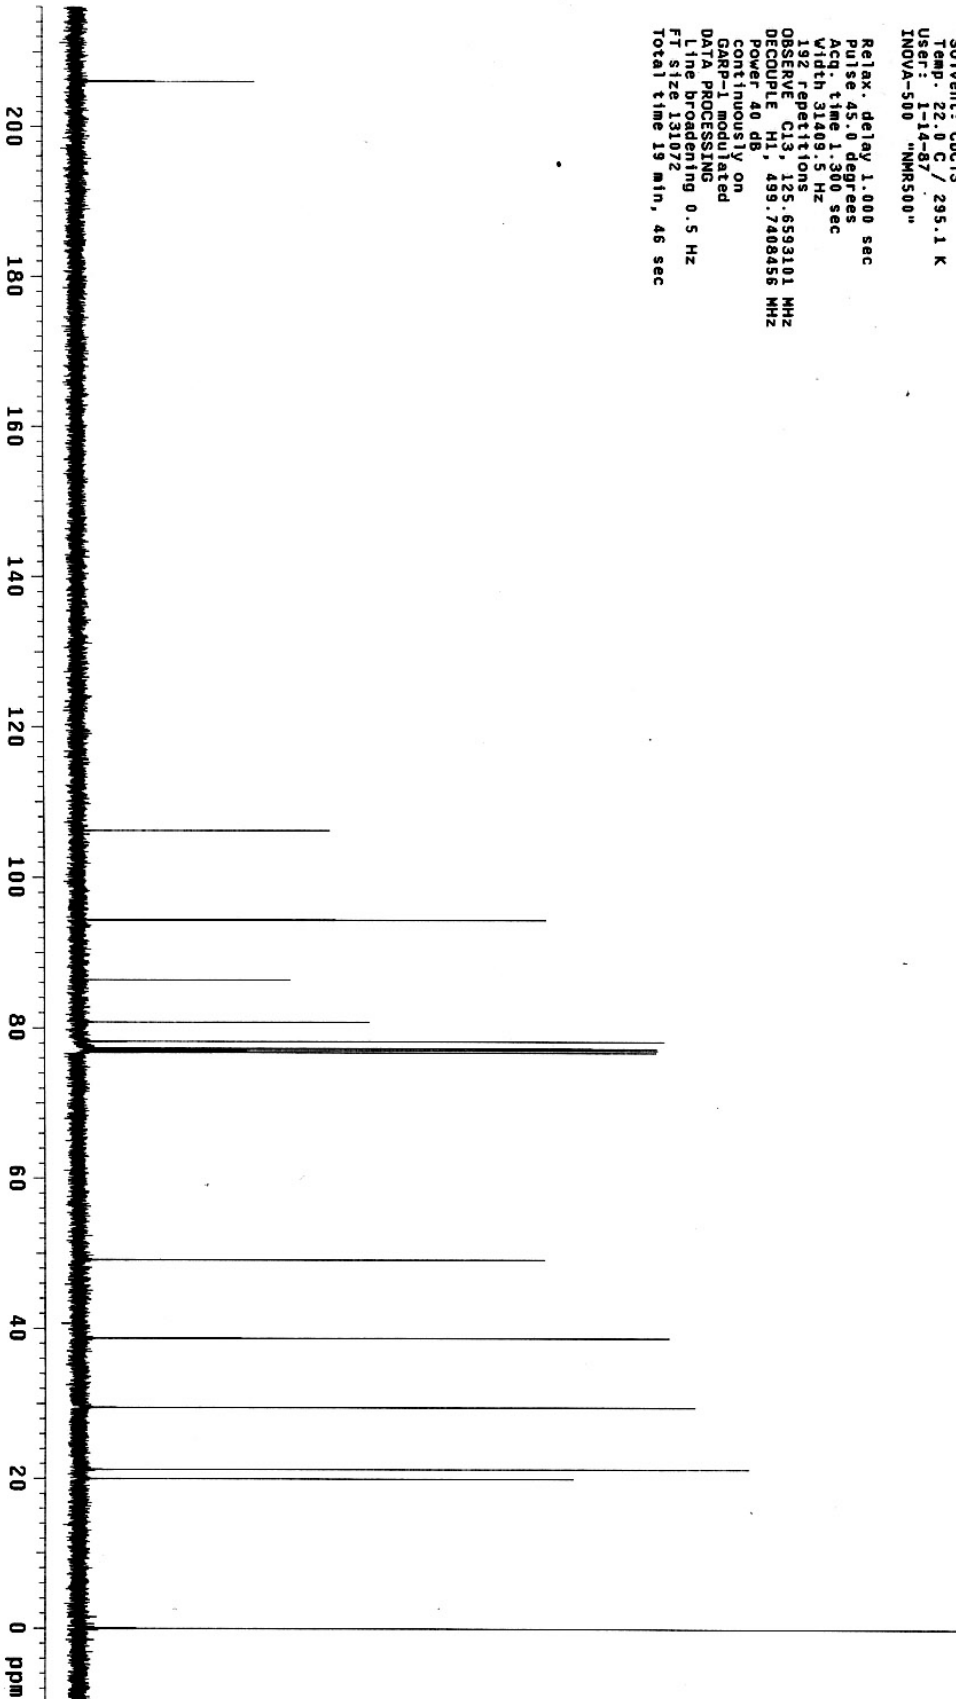

Archive directory: /export/home/TW01ab/vmrvys/data  
Sample directory: rebo1003a\_16Aug2003  
Pulse Sequence: szpul  
Solvent: CDCl3  
Acquisition Temperature  
F1 PROTON  
INOVA-500 "NMR500"  
Relax. delay: 1.000 sec  
Pulse program: zgpg30  
Acq. time: 1.582 sec  
Width: 7996.0 Hz  
# repetitions: 8  
OBSERVE: H1, 499.7355476 MHz  
DATA PROCESSING  
FT size: 32768  
Total time: 0 min, 29 sec

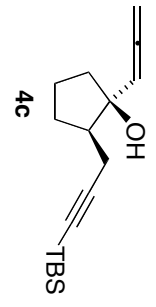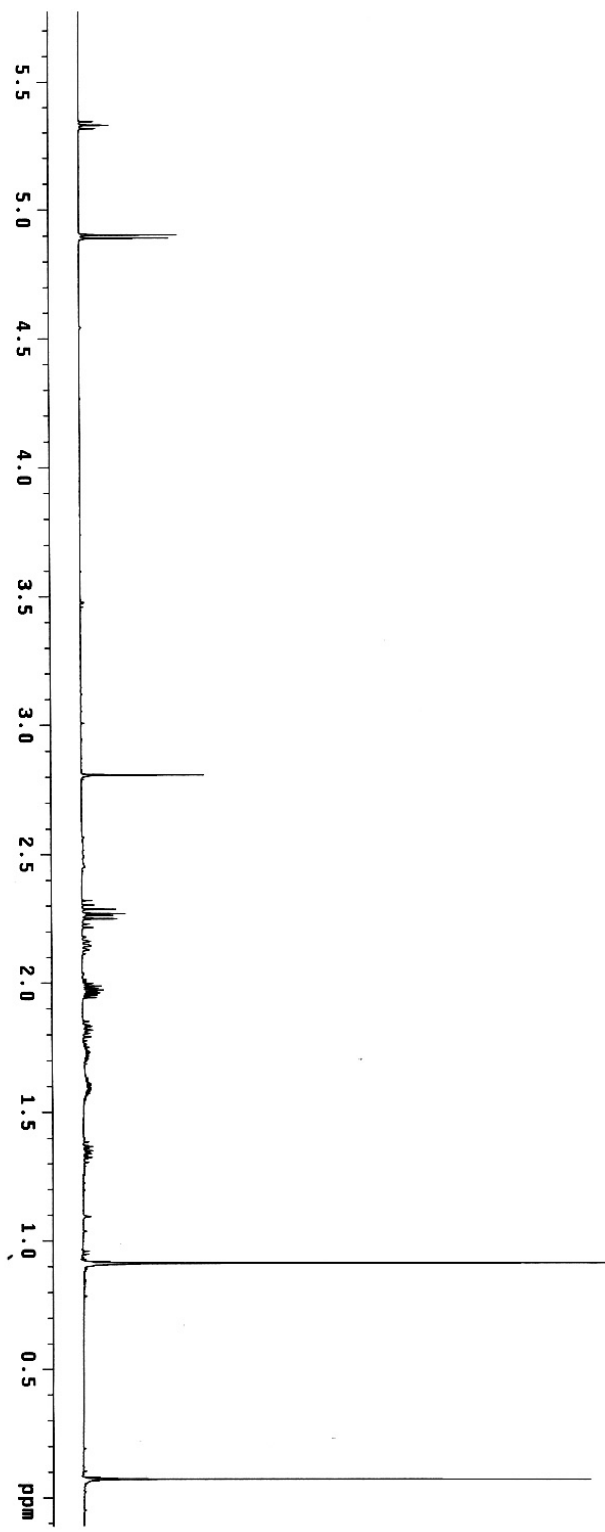

Archive directory: /export/home/TW01lab/vnmrsys/data  
Sample directory: rek01505a\_15Aug2005  
Pulse Sequence: szpul1  
Solvent: CDCl3  
Ambient temperature  
User: 1-14-87  
File: CARBON  
INOVA-500 "NMRS00"

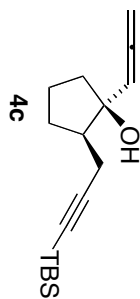

Relax. delay 1.000 sec  
Pulse 45.0 deg sec  
Acq. time 1.580 sec  
Freq 32402.5 Hz  
F1 F2 F3 F4 F5  
OBSERVE C13, 425.6586026 MHz  
DECOUPLE H1, 493.7380367 MHz  
Power 40 dB  
Gain manually on  
Gain manually on  
DATA PROCESSING  
Line broadening 0.5 Hz  
F1 size 131072  
Total time 19 min, 46 sec

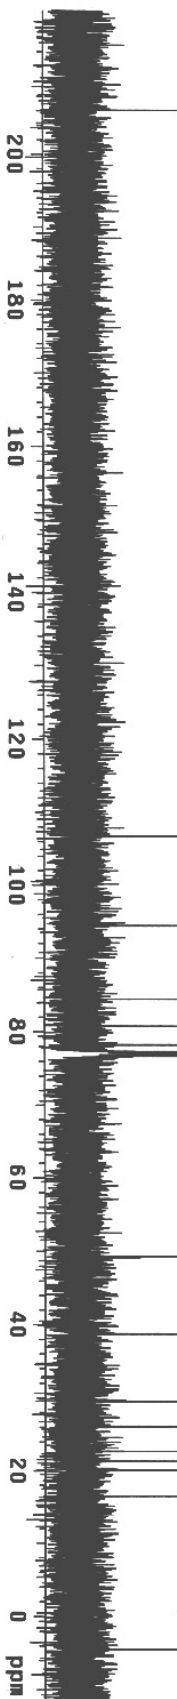

STANDARD PROTON PARAMETERS  
 expl szpul

|         |            |      |          |
|---------|------------|------|----------|
| date    | Dec 7 2005 | temp | 21.0     |
| solvent | CDCl3      | gain | not used |
| file    | CDCl3      | spin | 0        |
| title   | exp        | nst  | 0.008    |
| sw      | 799.62     | prg  | 11.300   |
| nd      | 30236      | atla | 0        |
| fb      | 4000       | fla  | 0        |
| bs      | 32         | in   | n        |
| ss      | 2          | dp   | y        |
| dl      | 1.000      | hs   | nn       |
| nt      | 8          | fn   | not used |
| ct      | 8          | fn   | not used |

  

|      |             |    |    |         |       |
|------|-------------|----|----|---------|-------|
| tn   | TRANSMITTER | h1 | sp | DISPLAY | 294.1 |
| sf   | 499.736     | w  | sp | 2629.1  | 0     |
| tof  | 499.7       | f  | f1 | 4632.8  | 0     |
| tpwr | 56          | r  | f  | 3616.1  | 0     |
| pw   | 5.750       | fp | fp | -178.5  | 0     |

  

|      |           |     |     |      |       |
|------|-----------|-----|-----|------|-------|
| dn   | DECOUPLER | cl3 | lp  | PLOT | -34.9 |
| dof  | 0         | wc  | sc  | 250  | 0     |
| dm   | 0         | mn  | sc  | 0    | 0     |
| dmm  | 3         | vs  | vs  | 112  | 0     |
| dpvr | 3         | tn  | tn  | 34   | 0     |
| dmi  | 33236     | at  | cdc | ph   | 0     |

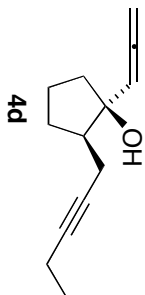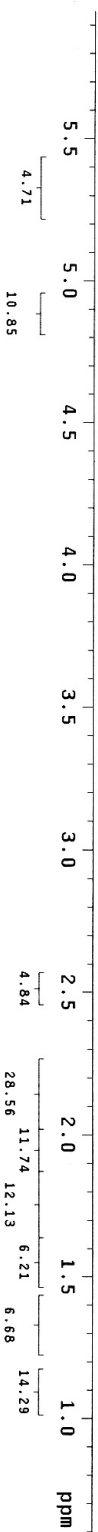



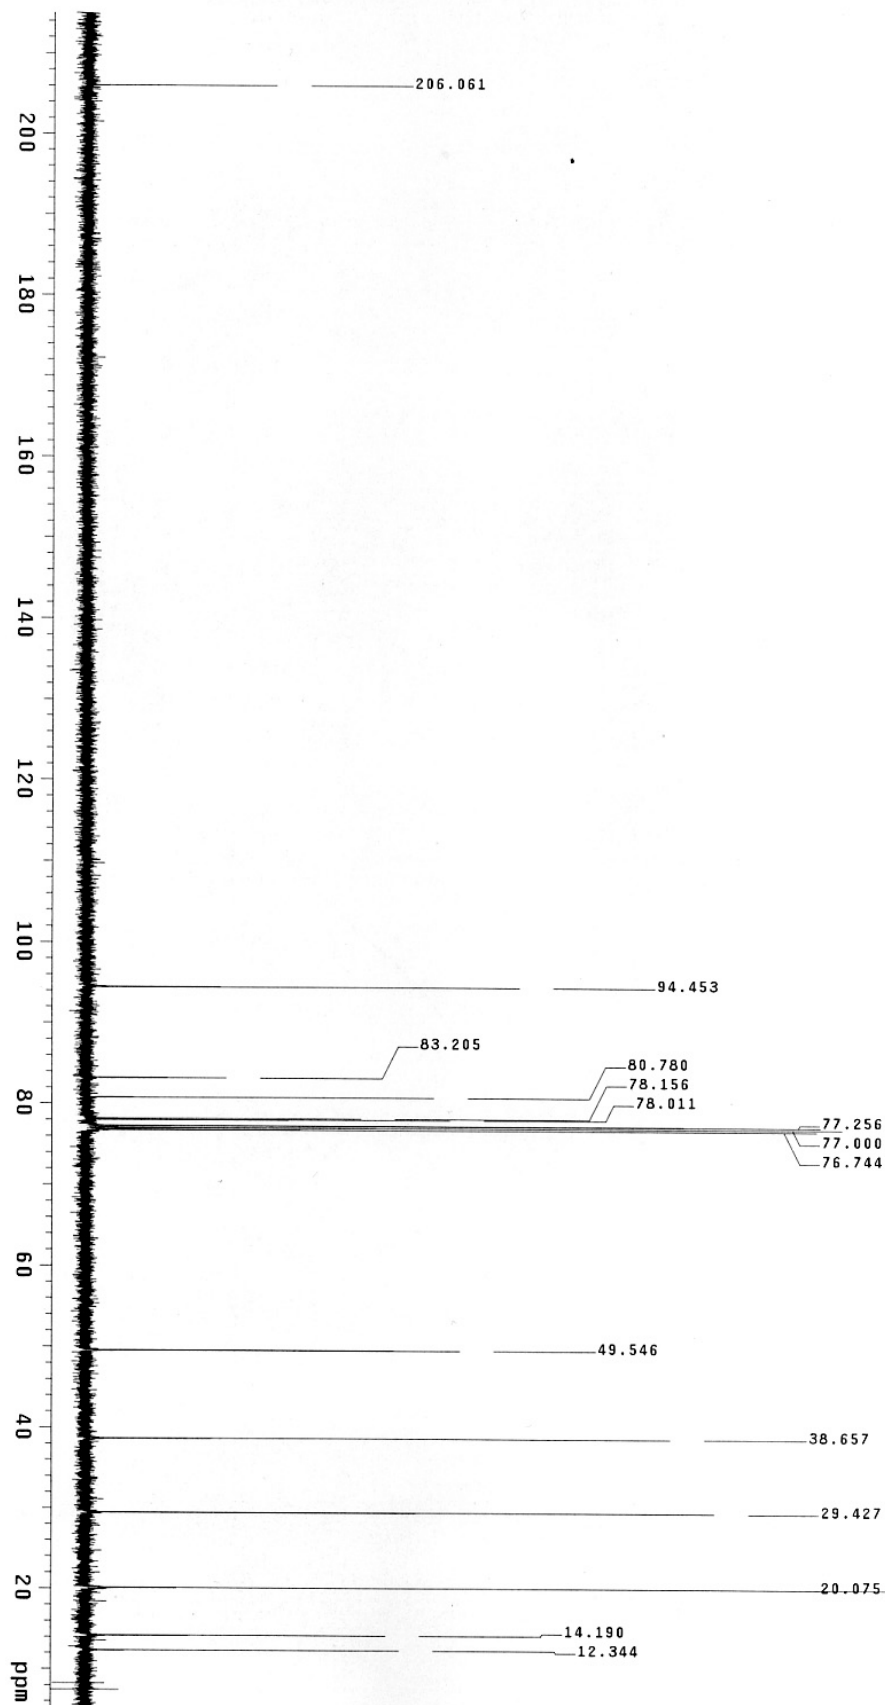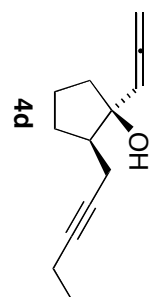

Archive directory: /export/home/TVOlab/vnmr-sys/data  
Sample directory: tv00921a\_21Sep2005

Pulse Sequence: s2pul  
Solvent: CDCl3  
Temp: 22.0 C / 295.1 K  
File: PROTON "NMR500"  
INDVA-500 "NMR500"

Relax. delay 1.000 sec  
Pulse: 45.0 degrees  
Acq. time 1.892 sec  
Width 999.0 Hz  
Observations 499.735516 MHz  
DATA PROCESSING  
FT size 32768  
Total time 0 min, 29 sec

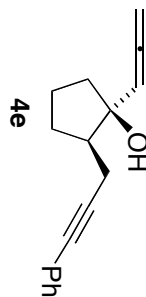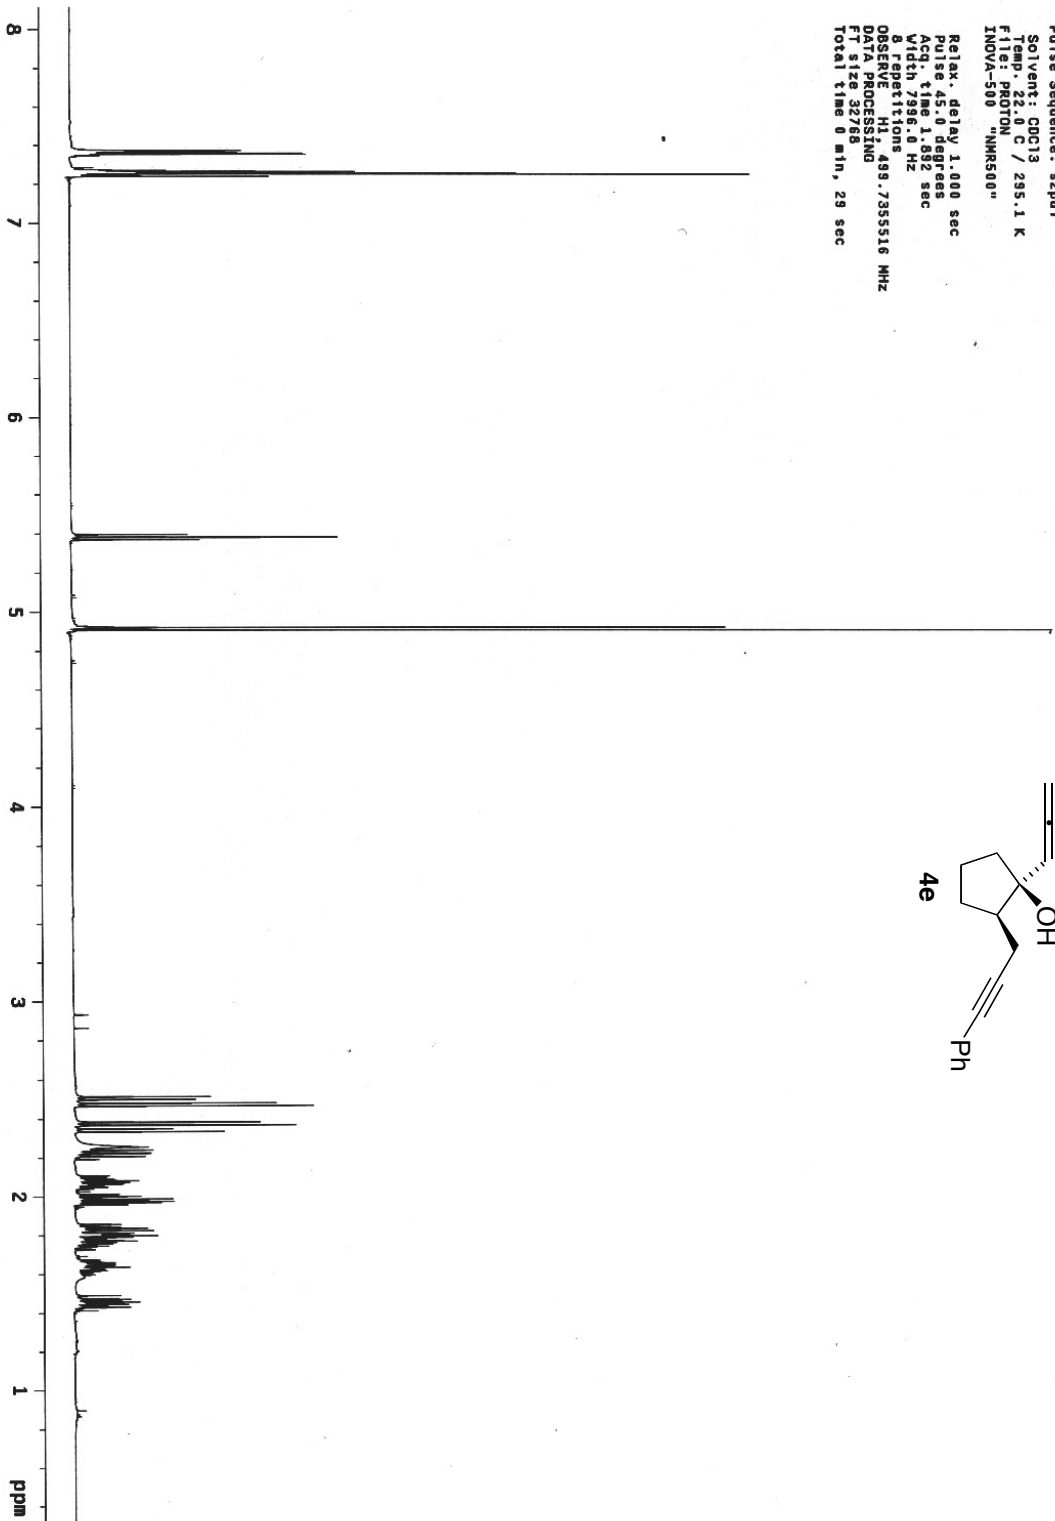

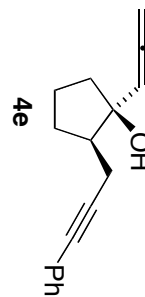

| INDEX | FREQUENCY | PPM     | HEIGHT |
|-------|-----------|---------|--------|
| 1     | 25989.928 | 206.034 | 12.6   |
| 2     | 16520.660 | 131.473 | 122.0  |
| 3     | 16111.842 | 128.219 | 119.8  |
| 4     | 16046.661 | 127.700 | 60.6   |
| 5     | 15533.362 | 123.616 | 10.0   |
| 6     | 11696.175 | 94.671  | 38.1   |
| 7     | 11167.683 | 88.673  | 29.4   |
| 8     | 10256.174 | 81.639  | 34.9   |
| 9     | 10149.711 | 80.772  | 42.7   |
| 10    | 9849.688  | 78.385  | 41.0   |
| 11    | 9707.344  | 77.252  | 94.0   |
| 12    | 9675.712  | 77.000  | 97.1   |
| 13    | 9643.601  | 76.744  | 95.0   |
| 14    | 6233.588  | 49.607  | 34.8   |
| 15    | 4886.837  | 38.890  | 42.6   |
| 16    | 3707.631  | 29.507  | 59.7   |
| 17    | 2637.618  | 20.990  | 75.5   |
| 18    | 2581.414  | 20.384  | 47.4   |

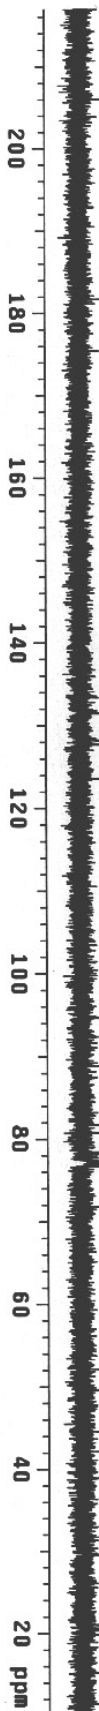

Archive directory: /export/home/TVOlab/vnmr-sys/data  
Sample directory: tv010206a\_02Jan2006

Pulse Sequence: s2pul  
Solvent: CDCl3  
Temp: 21.0 C / 294.1 K  
File: PROTON  
INQVA-500 "NMR590"

Relax. delay: 1.000 sec  
Pulse: 45.0 degrees  
Acq. time: 1.692 sec  
Width: 7996.0 Hz  
8 repetitions  
OBSERVE: H1, 499.735526 MHz  
F1: A1, 1202728  
F2: A1, 1202728  
Total time: 0 min, 29 sec

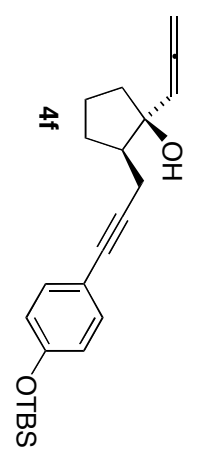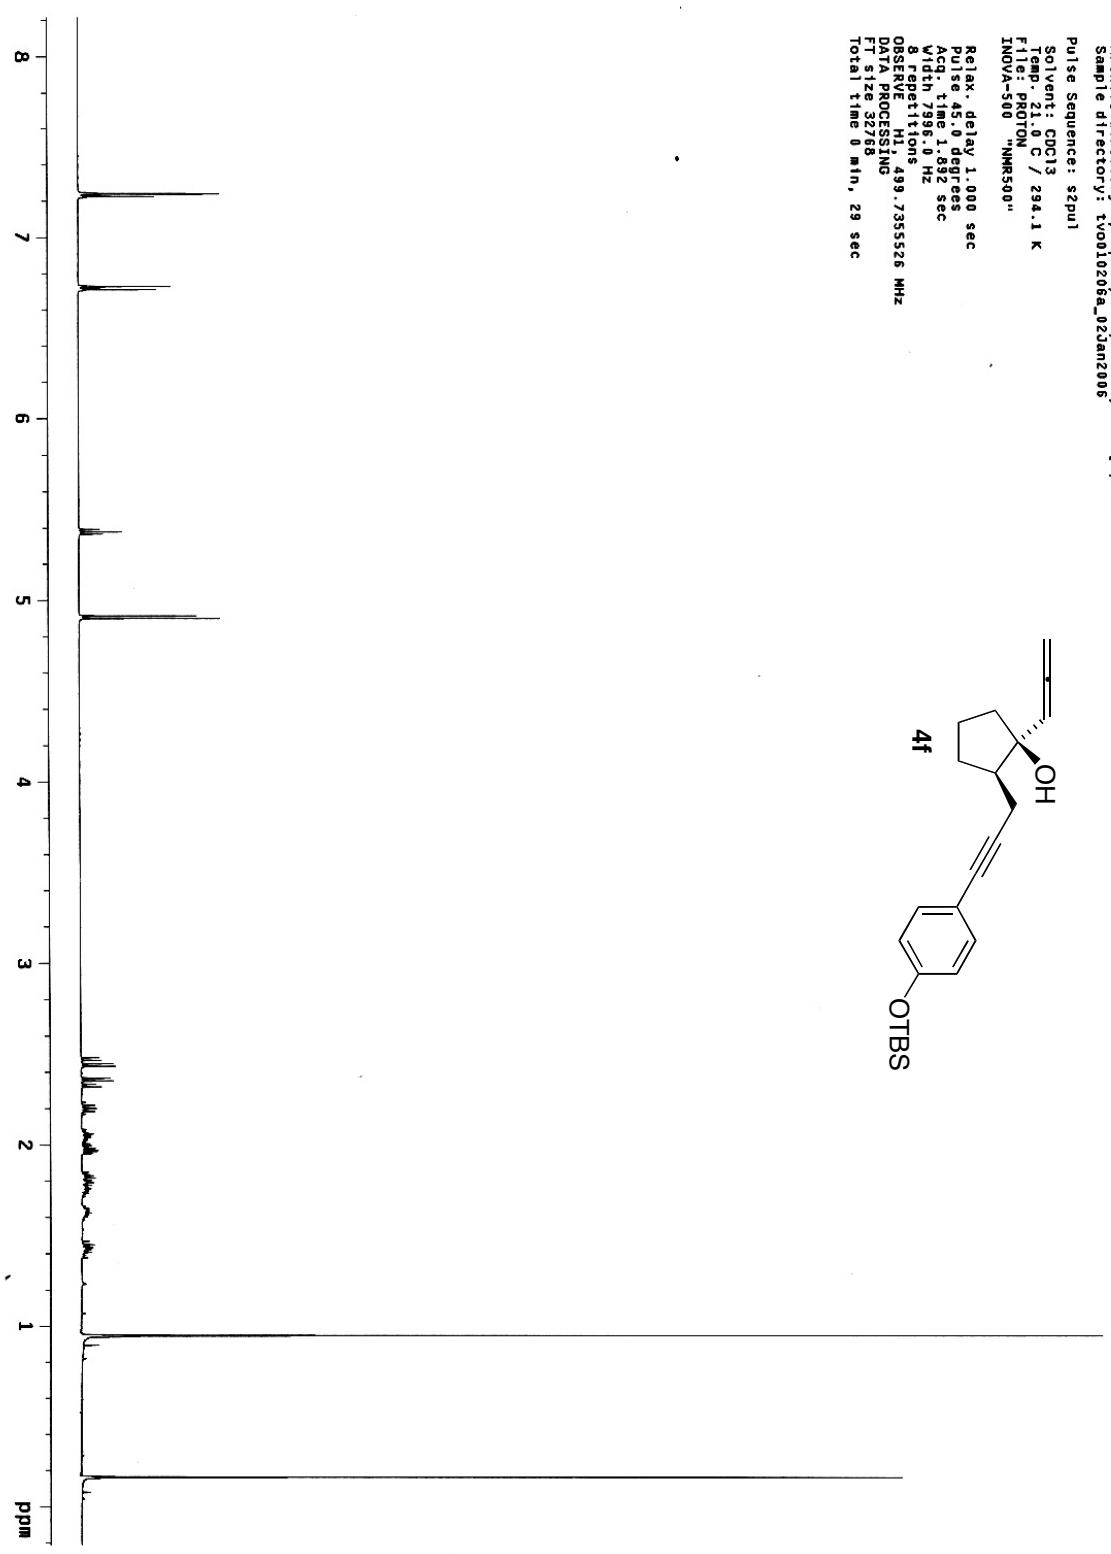

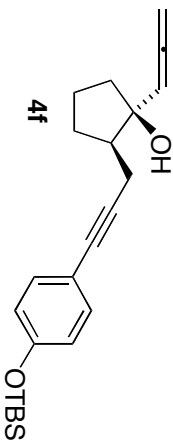

Archive directory: /export/home/TU01ab/vnmrSYS/data  
 Sample directory: tw0010206a\_02Jan2005  
 File: CARBON  
 Pulse Sequence: szpu1  
 Solvent: CDCl3  
 Temp: 21.0 C / 294.1 K  
 User: 1-14-87  
 INOVA-500 "NMR500"

Relax. delay 1.000 sec  
 Pulse 45.0 degrees  
 Acq. time 1.300 sec  
 Width 31409.5 Hz  
 448 repetitions  
 OBSERVE C13, 125.6586021 MHz  
 DECOUPLE H1, 499.7380307 MHz  
 Power 37 dB  
 continuously on  
 GARP-1 modulated  
 DATA PROCESSING  
 Line broadening 0.5 Hz  
 FT size 131072  
 Total time 19 min, 46 sec

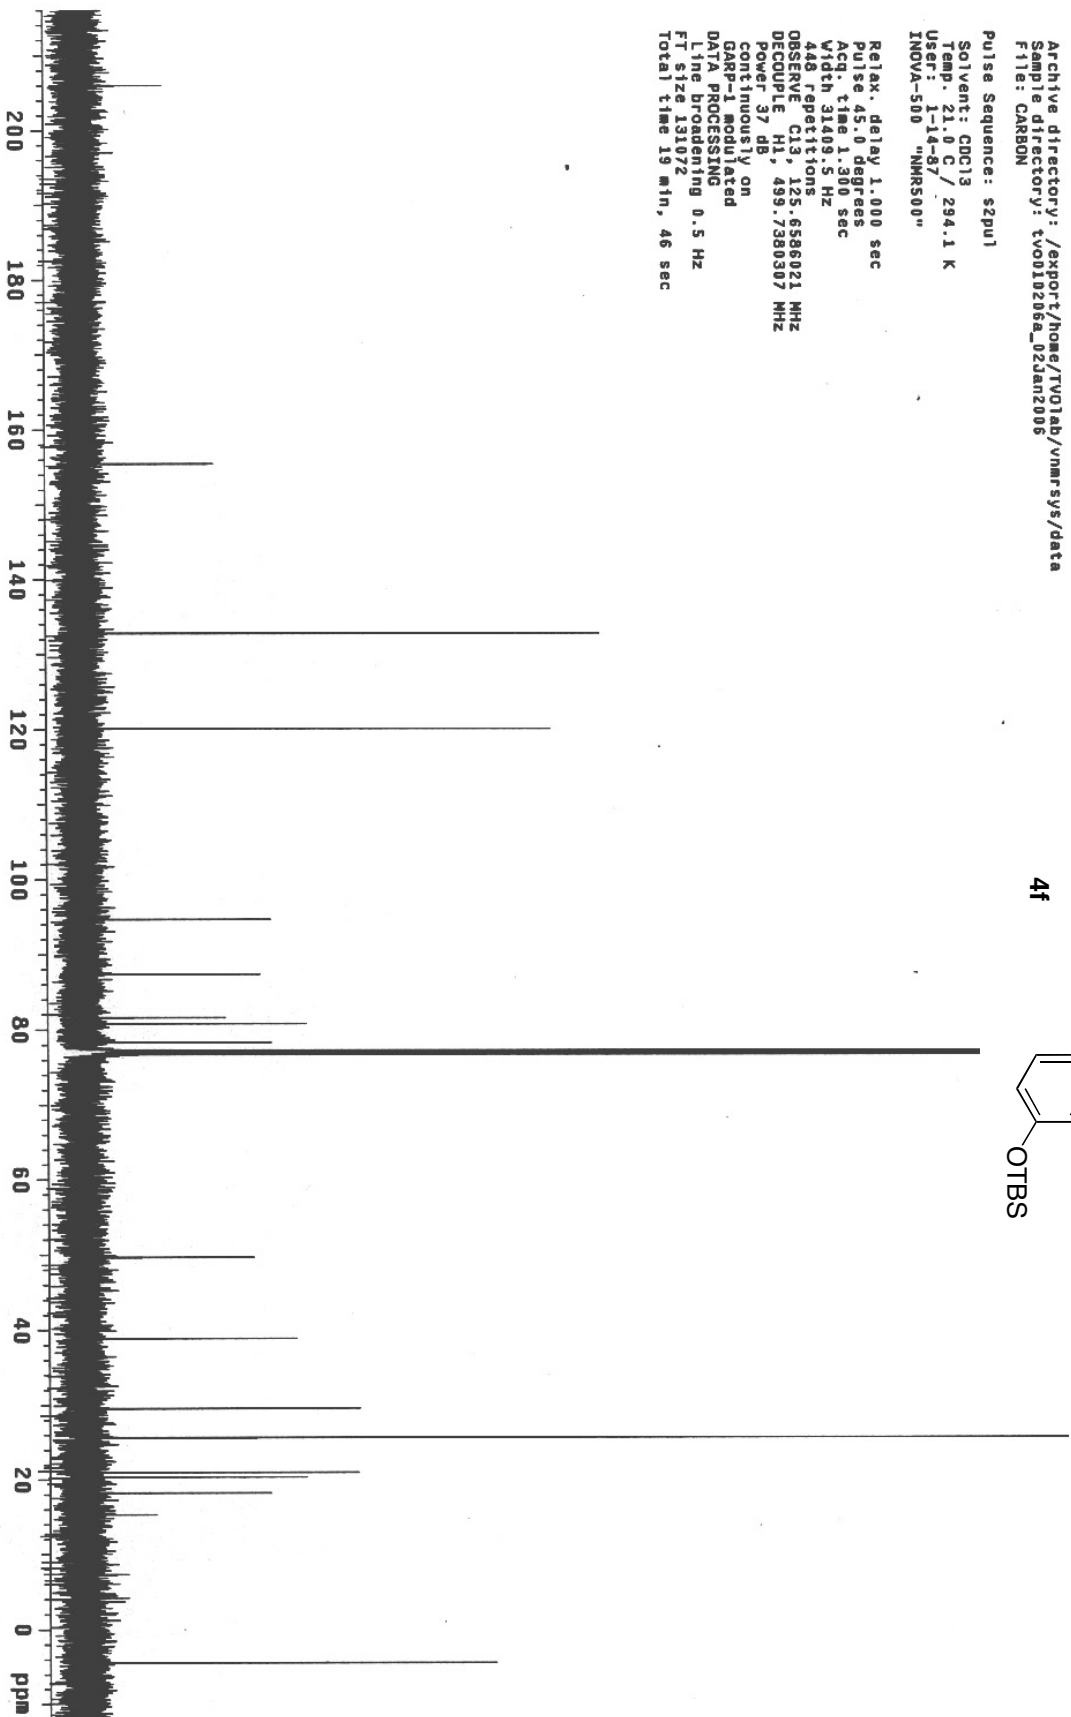

Archive directory: /export/home/TVDlab/vmrsys/data  
Sample directory: tw01066b\_06oct2005

Pulse Sequence: szpu1

Solvent: CDCl3

Temp: 22.0 C / 295.1 K

File: PROTON "NMRS500"

INOVA-500 "NMRS500"

Relax: delay 1.000 sec

Pulse 45.0 degrees

Acq. time 1.892 sec

Width 796.0 Hz

# repetitions 8

OBSERVE H1, 499.735516 MHz

DATA PROCESSING

FI size 32768

Total time 0 min, 29 sec

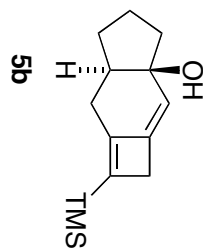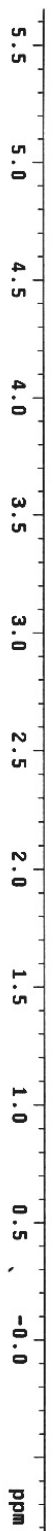

TMS derivative

Archive directory: /export/home/TW01lab/vnmrsws/data  
Sample directory: tw01007a\_07oct2005  
File: CARBON

Pulse Sequence: szpu1

Solvent: CMC13  
Temp: 22.0 C / 295.1 K  
User: J-14-87  
INOVA-500 "NMR500"

Relax. delay: 1.000 sec  
Pulse: 45.0 degrees  
Acq. time: 1.390 sec  
Width: 31489.5 Hz  
256 repetitions  
OBSERVE: C13, 125.6586031 MHz  
DECOUPLE: H1, 499.7988907 MHz  
Power: 40 dB  
continuously on  
GARP-1 modulated  
DATA PROCESSING  
Line broadening: 0.5 Hz  
FT size: 131072  
Total time: 9 min, 55 sec

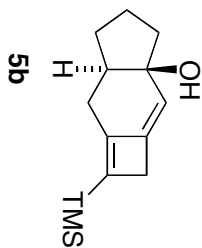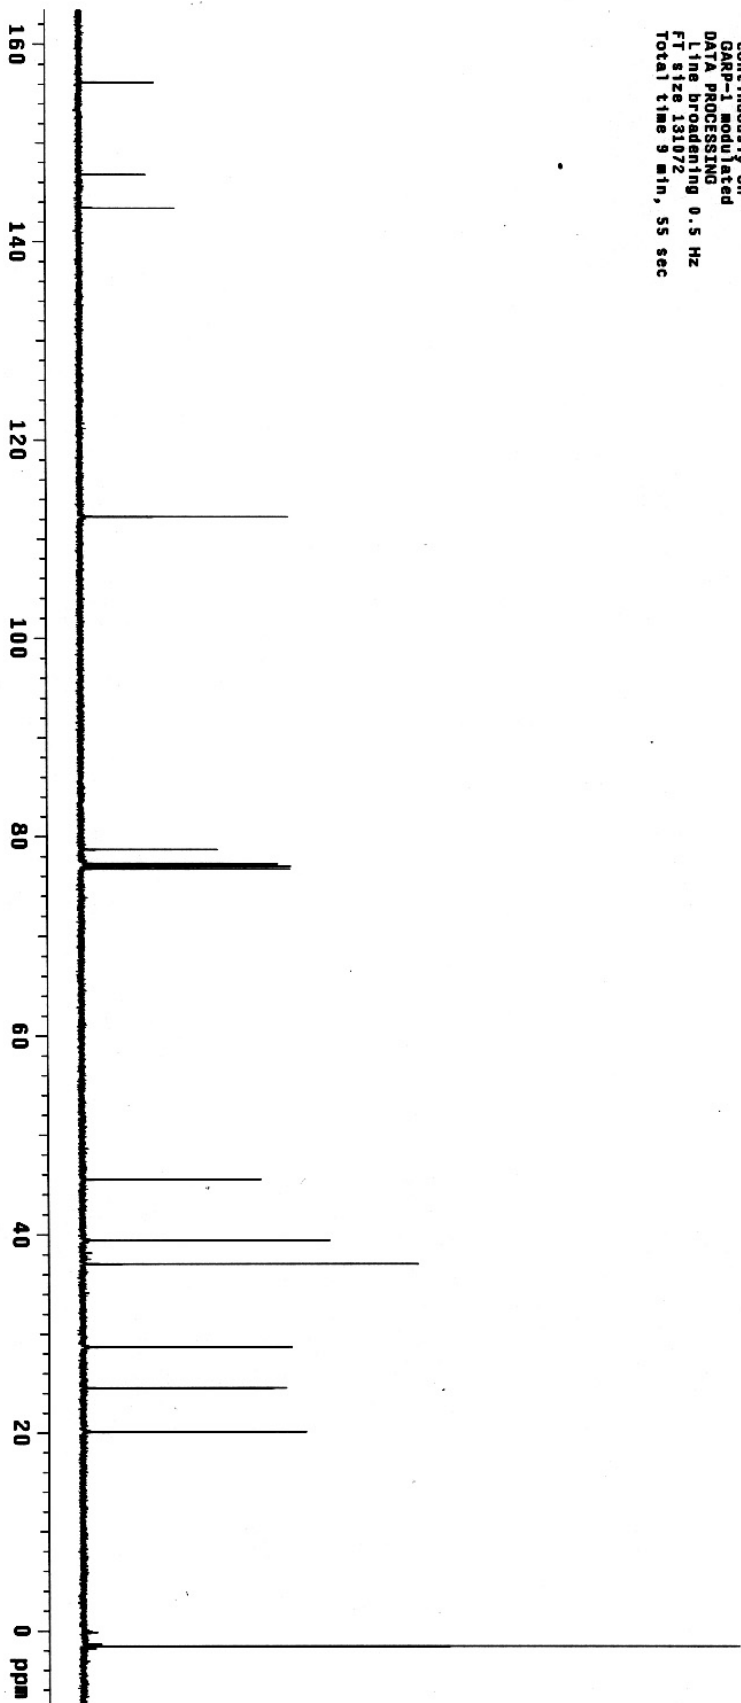

Archive directory: /export/home/TVOlab/vnmrsys/data  
Sample directory: tv01006b\_060c12005  
Pulse Sequence: szpul  
Solvent: CDCl3  
Temp: 22.0 C / 295.1 K  
File: PROTON  
INNOVA-500 "NMRS500"  
Relax. delay 1.000 sec  
Pulse 45.0 degrees  
Acq. time 1.892 sec  
Width 7996.0 Hz  
# repetitions 8  
OBSERVE H1, 499.7355516 MHz  
DATA PROCESSING  
F1 size 32788  
Total time 0 min, 29 sec

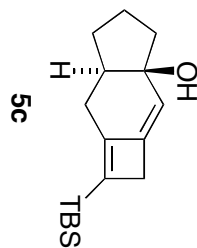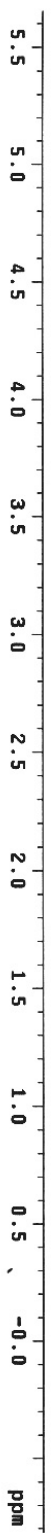



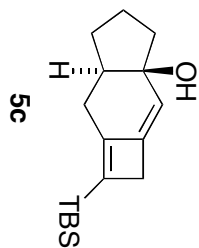

Pulse Sequence: szput  
 Solvent: CDCl3  
 Temp: 22.0 C / 295.1 K  
 User: 1-14-87  
 INOVA-500 "NMRS00"

Relax. delay 1.000 sec  
 Pulse 45.0 degrees  
 Acq. time 1.380 sec  
 Width 31403.5 Hz  
 192 repetitions  
 OBSERVE C13, 125.6586021 MHz  
 DECOUPLE H1, 499.7380307 MHz  
 Power 40 dB  
 continuously on  
 GARP-1 modulated  
 DATA PROCESSING  
 Line broadening 0.5 Hz  
 FT size 131072  
 Total time 19 min, 46 sec

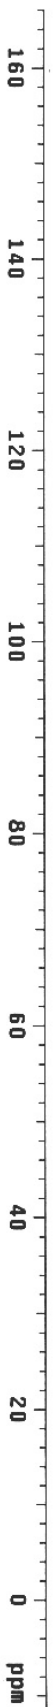

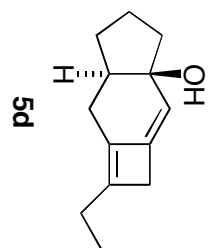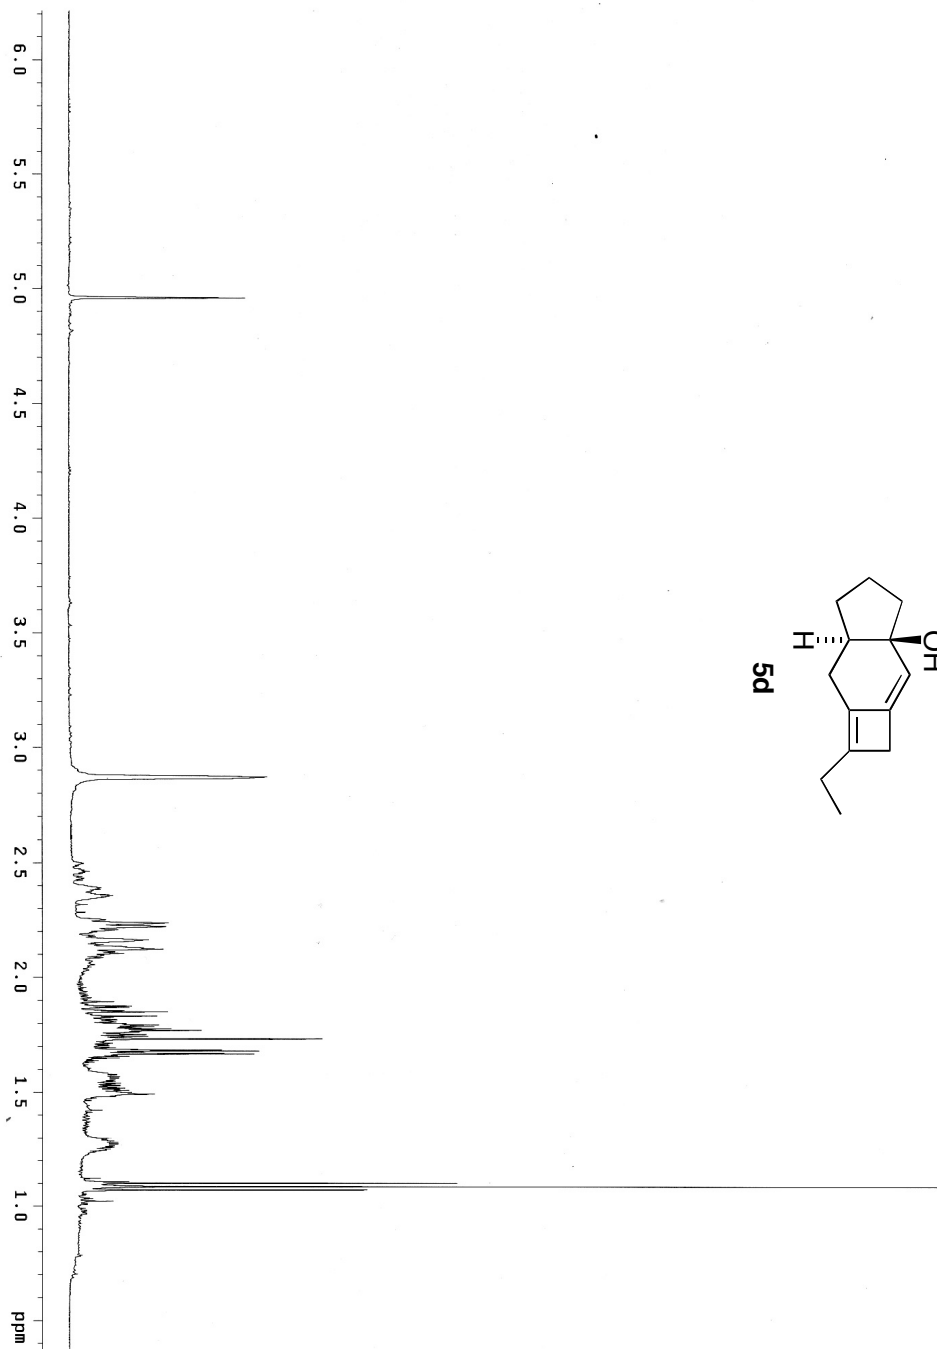

Archive directory: /export/home/TW01lab/vnmrsys/data  
Sample directory: tw01214f\_14dec2005  
File: CARBON

Pulse Sequence: s2pul

Solvent: CDCl3 / 294.1 K  
User: l-14-87  
INOVA-500 "NMR500"

Relax. delay: 1.000 sec  
Pulse: 45.0 degrees  
Acq. time: 1.300 sec  
Width: 31409.5 Hz  
5000 repetitions  
OBSERVE: C13, 125.6566026 MHz  
DECUPLE: H1, 499.7380307 MHz  
Power: 37 dB  
COP: 1 (noisy) on  
GPP: 1 (noisy) on  
DATA PROCESSING  
Line broadening: 0.5 Hz  
FT size: 131072  
Total time: 3 hr, 12 min, 27 sec

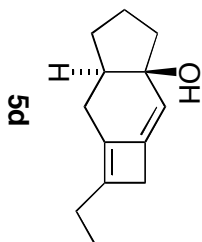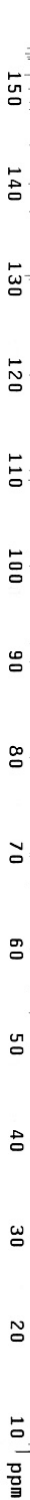

Pulse Sequence: s2pu1  
Solvent: CDCl3  
Temp: 22.0 C / 295.1 K  
F1f6: PROTON  
INOVA-500 "NMR500"  
Relax. delay 1.000 sec  
Pulse 45.0 degrees  
Acq. time 1.692 sec  
Width 7996.0 Hz  
# Repetitions 8  
OBSERVE H1, 499.735516 MHz  
DATA PROCESSING  
F1 size 32758  
Total time 8 min, 29 sec

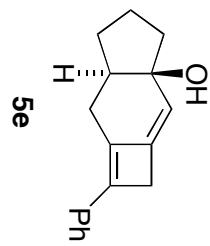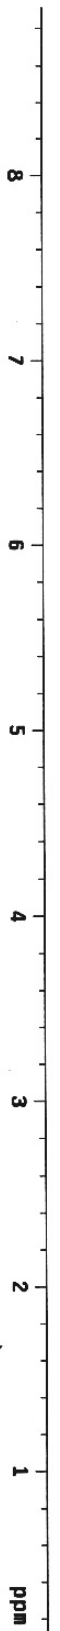

Archive directory: /export/home/TU01ab/vmr/sys/data  
Sample directory: /v00926a\_25sep2005

Pulse Sequence: szpul

Solvent: CDCl3

Temp: 22.0 C / 293.1 K

User: 1-14-87

File: CARBON

INOVA-500 "NMR500"

Relax. delay 1.000 sec  
Pulse 45.0 degrees  
Acq. time 1.300 sec  
Width 31409.5 Hz  
512 repetitions  
OBSERVE C13, 125.6586021 MHz  
DECOUPLE H1, 499.7380307 MHz  
power 40 db  
continuously on  
GARP-1 modulated  
DATA PROCESSING  
Line broadening 0.5 Hz  
FT size 131072  
Total time 19 min, 45 sec

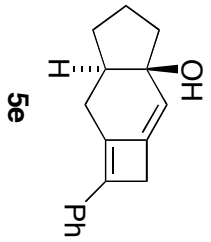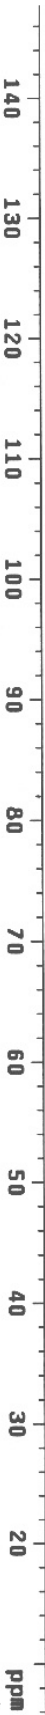

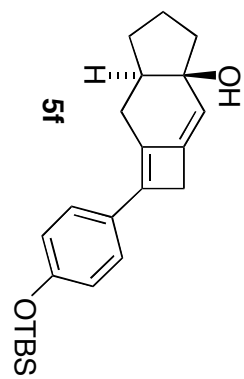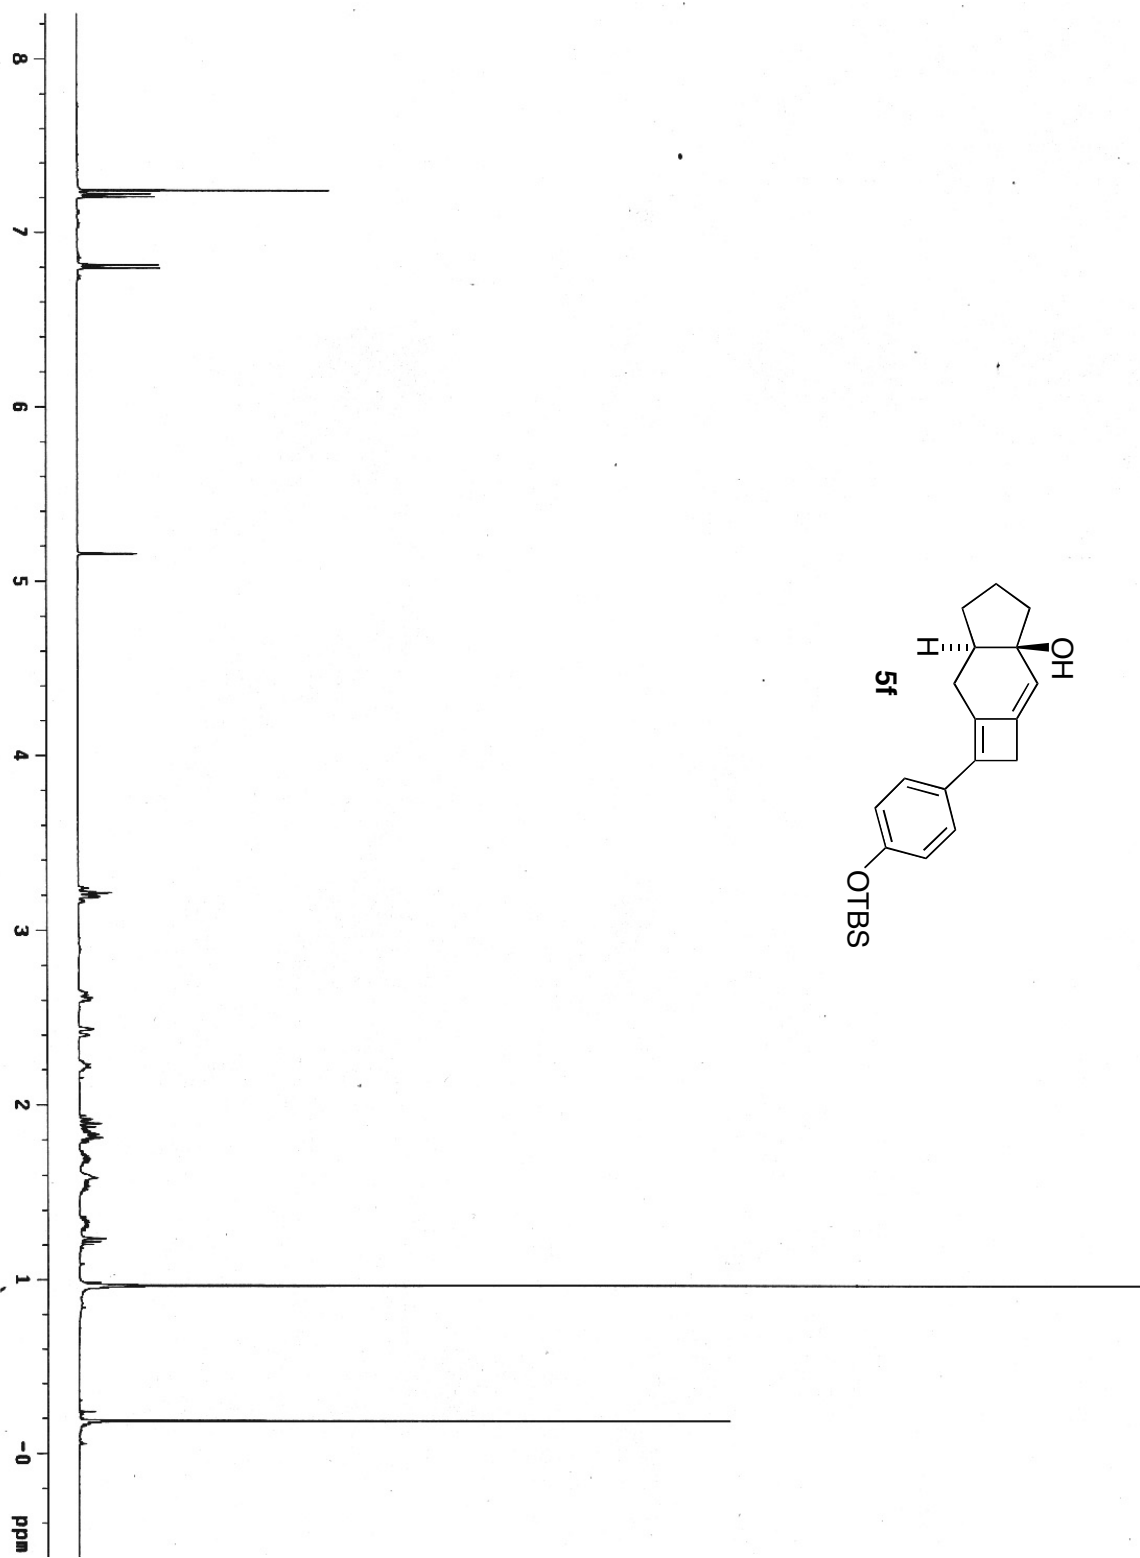

Pulse Sequence: szpul  
Solvent: CDCl3  
Temp: 21.0 C / 294.1 K  
User: 1-14-87  
INNOVA-500 "NMR500"

Relax. delay 1.000 sec  
Pulse 45.0 degrees  
Acq. time 1.200 sec  
Width 31493.5 Hz  
218 repetitions  
OBSERVE C13, 125.6586036 MHz  
DECOUPLE H1, 499.7380307 MHz  
Power 37 dB  
Continuously on  
GARP 1 modulated  
DATA PROCESSING  
Line broadening 0.5 Hz  
FT size 131072  
Total time 19 min, 46 sec

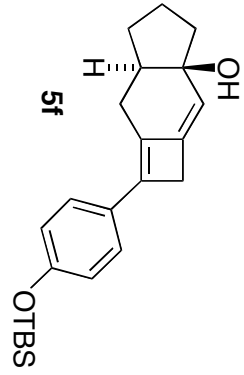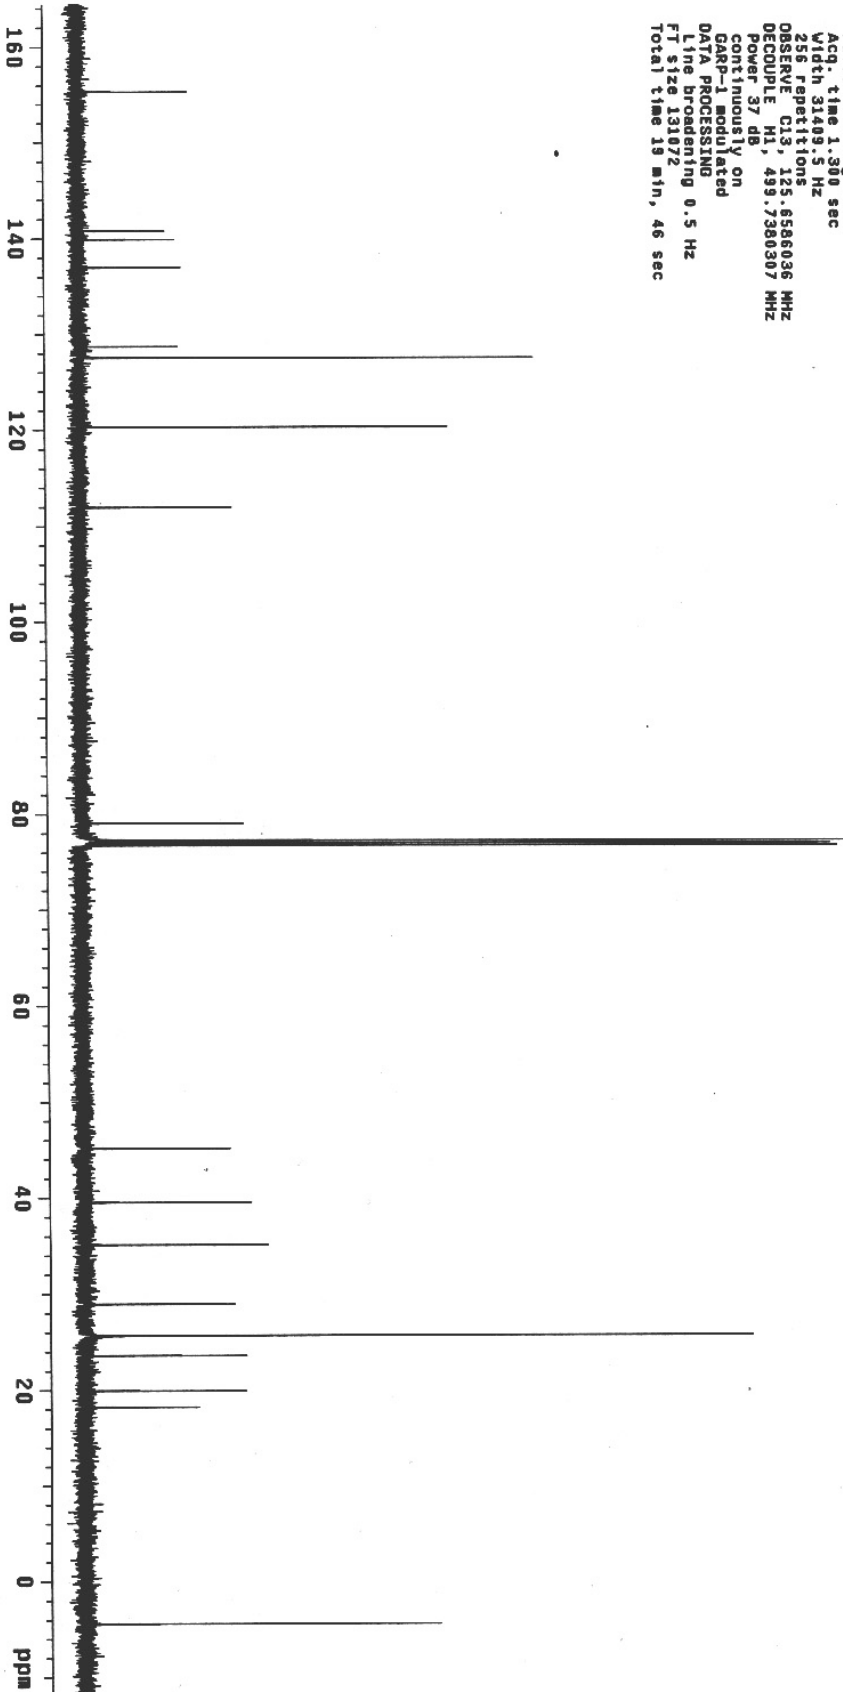

Compound **4a**: <sup>1</sup>H NMR (CDCl<sub>3</sub>, 500 MHz) δ 5.30 (t, J=6.59 Hz, 1 H), 4.88 (d, J=6.34 Hz, 2 H), 2.28 – 2.38 (m, 1 H), 2.22 – 2.27 (m, 1 H), 2.10 - 2.16 (m, 2 H), 1.98 - 2.04 (m, 1 H), 1.95 – 1.98 (m, 1 H), 1.90 - 1.95 (m, 1 H), 1.68 - 1.82 (m, 2 H), 1.54 - 1.62 (m, 1 H), 1.32 – 1.40 (m, 1 H); <sup>13</sup>C NMR (CDCl<sub>3</sub>, 125 MHz) δ 206.00, 94.45, 83.45, 80.62, 78.33, 69.32, 49.28, 38.81, 29.34, 20.17, 19.88. HRMS calc'd for C<sub>11</sub>H<sub>13</sub>O (M<sup>+</sup>-1) 161.0966, found 161.0967.

Compound **4b**: <sup>1</sup>H NMR (CDCl<sub>3</sub>, 500 MHz) δ 5.30 (t, J=6.59 Hz, 1 H), 4.89 (d, J=6.34 Hz, 2 H), 2.58 (s, 1 H), 2.21 – 2.28 (m, 2 H), 2.08 – 2.16 (m, 1 H), 1.91 – 1.99 (m, 2 H), 1.77 – 1.84 (m, 1 H), 1.66 – 1.78 (m, 1 H), 1.52 – 1.62 (m, 1 H), 1.26 – 1.37 (m, 1 H), 0.12 (s, 9 H); <sup>13</sup>C NMR (CDCl<sub>3</sub>, 125 MHz) δ 206.06, 106.19, 94.36, 86.36, 80.77, 78.20, 49.14, 38.68, 29.46, 21.22, 19.96, -0.03. HRMS calc'd for C<sub>14</sub>H<sub>21</sub>OSi (M<sup>+</sup>-1) 233.1362, found 233.1363.

Compound **4c**: <sup>1</sup>H NMR (CDCl<sub>3</sub>, 500 MHz) δ 5.33 (t, J=6.59 Hz, 1 H), 4.90 (d, J=6.34 Hz, 2 H), 2.29 (dd, J=17.08, 8.30 Hz, 1 H), 2.23 (dd, J=16.59, 9.76 Hz, 1 H), 2.10 – 2.18 (m, 1 H), 1.90 – 2.05 (m, 2 H), 1.76 – 1.90 (m, 1 H), 1.68 – 1.76 (m, 1 H), 1.54 – 1.64 (m, 2 H), 1.30 – 1.40 (m, 1 H), 0.91 (s, 9 H), 0.07 (s, 6 H); <sup>13</sup>C NMR (CDCl<sub>3</sub>, 125 MHz) δ 206.05, 106.72, 94.45, 84.41, 80.79, 78.24, 49.27, 38.74, 29.45, 26.06, 22.64, 21.27, 20.06, 16.47, -4.51. HRMS calc'd for C<sub>17</sub>H<sub>28</sub>OSi 276.1910, found 276.1908.

Compound **4d**: <sup>1</sup>H NMR (CDCl<sub>3</sub>, 500 MHz) δ 5.35 (t, J=6.83 Hz, 1 H), 4.87 (d, J=6.83 Hz, 2 H), 2.5 (br. s, 1 H), 2.02 - 2.21 (m, 5 H), 1.90 – 1.98 (m, 2 H), 1.75 – 1.83 (m, 1 H), 1.65 – 1.74 (m, 1 H), 1.52 - 1.60 (m, 1 H), 1.27 – 1.36 (m, 1 H), 1.09 (t, J=7.32 Hz, 3 H); <sup>13</sup>C NMR (CDCl<sub>3</sub>, 125 MHz) δ 206.06, 94.45, 83.21, 80.78, 78.16, 78.01, 49.55, 38.66, 29.43, 20.07 (2 overlapping peaks), 14.19, 12.43. HRMS calc'd for C<sub>13</sub>H<sub>18</sub>O 190.1358, found 190.1358.

Compound **4e**: <sup>1</sup>H NMR (CDCl<sub>3</sub>, 500 MHz) δ 7.36 - 7.42 (m, 2 H), 7.26 - 7.31 (m, 3 H), 5.41 (t, J=6.59 Hz, 1 H), 4.91 (d, J=6.35 Hz, 2 H), 2.52 (dd, J=16.59, 7.32 Hz, 1 H), 2.39 (dd, J=17.08, 7.81 Hz, 1 H), 2.21 - 2.32 (m, 2 H), 2.06 - 2.15 (m, 1 H), 1.98 - 2.05 (m, 1 H), 1.74 - 1.91 (m, 2 H), 1.62 - 1.72 (m, 1 H), 1.43 - 1.53 (m, 1 H); <sup>13</sup>C NMR (CDCl<sub>3</sub>, 125 MHz) δ 206.02, 131.47, 128.21, 127.70, 123.61, 94.67, 88.88, 81.70, 80.77, 78.38, 49.61, 38.90, 29.51, 21.00, 20.39. HRMS calc'd for C<sub>17</sub>H<sub>16</sub> (M<sup>+</sup>-H<sub>2</sub>O) 220.1252, found 220.1254.

Compound **4f**: <sup>1</sup>H NMR (CDCl<sub>3</sub>, 500 MHz) δ 7.26 (d, J=8.30 Hz, 2 H), 6.75 (d, J=8.30 Hz, 2 H), 5.41 (t, J=6.59 Hz, 1 H), 4.90 (d, J=6.83 Hz, 2 H), 2.48 (dd, J=16.6 Hz, 8.30 Hz, 1 H), 2.37 (dd, J=17.08, 6.83 Hz, 1 H), 2.32 (s, 1 H), 2.19 - 2.27 (m, 1 H), 2.08 (dddd, J=12.63, 8.66, 8.48, 3.90 Hz, 1 H), 1.96 – 2.04 (m, 1 H), 1.80 – 1.89 (m, 1 H), 1.73 – 1.81 (m, 1 H), 1.60 – 1.70 (m, 1 H), 1.39 – 1.51 (m, 1 H), 0.98 (s, 9 H), 0.19 (s, 6 H); <sup>13</sup>C NMR (CDCl<sub>3</sub>, 125 MHz) δ 206.04, 155.46, 132.79, 120.09, 94.67, 87.33, 81.59, 80.80, 78.33, 49.65, 38.87, 29.53, 29.49, 25.63, 20.96, 20.35, 18.20, -4.44. HRMS calc'd for C<sub>23</sub>H<sub>30</sub>OSi (M<sup>+</sup>-H<sub>2</sub>O) 350.2066, found 350.2068.



Compound **5b**:  $^1\text{H}$  NMR ( $\text{CDCl}_3$ , 500 MHz)  $\delta$  5.04 (s, 1 H), 2.92 - 3.00 (m, 2 H), 2.40 - 2.51 (m, 1 H), 2.11 - 2.21 (m, 2 H), 1.82 - 1.92 (m, 2 H), 1.75 - 1.82 (m, 1 H), 1.65 - 1.75 (m, 1 H), 1.61 (s, 1 H), 1.48 - 1.60 (m, 1 H), 1.23 - 1.35 (m, 1 H);  $^{13}\text{C}$  NMR ( $\text{CDCl}_3$ , 125 MHz)  $\delta$  156.17, 146.77, 143.38, 112.23, 78.69, 45.51, 39.41, 37.06, 28.67, 24.52, 20.10, -1.56. HRMS calc'd for  $\text{C}_{14}\text{H}_{22}\text{OSi}$  234.1440, found 234.1334.

Compound **5c**:  $^1\text{H}$  NMR ( $\text{CDCl}_3$ , 500 MHz)  $\delta$  5.00 - 5.06 (m, 1 H), 2.96 - 3.06 (m, 2 H), 2.43 - 2.52 (m, 1 H), 2.13 - 2.21 (m, 2 H), 1.77 - 1.93 (m, 3 H), 1.66 - 1.76 (m, 1 H), 1.49 - 1.60 (m, 2 H), 1.25 - 1.35 (m, 1 H), 0.91 (s, 9 H), 0.07 (s, 3 H), 0.07 (s, 3 H);  $^{13}\text{C}$  NMR ( $\text{CDCl}_3$ , 125 MHz)  $\delta$  157.45, 145.46, 143.63, 111.90, 78.60, 45.54, 39.49, 38.60, 28.63, 26.53, 24.80, 20.07, 17.24, -5.97, -6.06. HRMS calc'd for  $\text{C}_{17}\text{H}_{22}\text{Si}$  ( $\text{M}^+ - \text{H}_2\text{O}$ ) 258.1804, found 258.1800.

Compound **5d**:  $^1\text{H}$  NMR ( $\text{CDCl}_3$ , 500 MHz)  $\delta$  4.98 (s, 1 H), 2.84 - 2.94 (m, 2 H), 2.30 - 2.43 (m, 1 H), 2.13 - 2.29 (m, 3 H), 1.84 - 1.95 (m, 3 H), 1.73 - 1.84 (m, 1 H), 1.62 - 1.74 (m, 1 H), 1.44 - 1.61 (m, 2 H), 1.23 - 1.33 (m, 1 H), 1.10 (t,  $J=7.57$  Hz, 3 H);  $^{13}\text{C}$  NMR ( $\text{CDCl}_3$ , 125 MHz)  $\delta$  146.78, 141.23, 138.21, 109.58, 78.94, 45.13, 39.49, 36.82, 28.57, 23.45, 22.20, 19.87, 11.56.

Compound **5e**:  $^1\text{H}$  NMR ( $\text{CDCl}_3$ , 500 MHz)  $\delta$  7.35 - 7.39 (m, 3 H), 7.20 - 7.30 (m, 2 H), 5.25 (s, 1 H), 3.17 - 3.37 (m, 2 H), 2.65 - 2.75 (m, 1 H), 2.45 - 2.54 (m, 1 H), 2.22 - 2.32 (m, 1 H), 1.81 - 2.00 (m, 3 H), 1.68 - 1.79 (m, 1 H), 1.52 - 1.66 (m, 2 H), 1.30 - 1.41 (m, 1 H);  $^{13}\text{C}$  NMR ( $\text{CDCl}_3$ , 125 MHz)  $\delta$  140.57, 140.11, 139.34, 135.06, 128.49, 127.43, 126.13, 113.15, 79.02, 45.20, 39.57, 35.06, 28.99, 23.82, 20.00. HRMS calc'd for  $\text{C}_{17}\text{H}_{18}\text{O}$  238.1356, found 238.1358.

Compound **5f**:  $^1\text{H}$  NMR ( $\text{CDCl}_3$ , 500 MHz)  $\delta$  7.24 (d,  $J=8.54$  Hz, 2 H), 6.83 (d,  $J=8.54$  Hz, 2 H), 5.19 (s, 1 H), 3.17 - 3.31 (m, 2 H), 2.60 - 2.70 (m, 1 H), 2.40 - 2.50 (m, 1 H), 2.20 - 2.30 (m, 1 H), 1.80 - 1.99 (m, 2 H), 1.67 - 1.78 (m, 1 H), 1.51 - 1.66 (m, 2 H), 1.30 - 1.40 (m, 1 H), 1.22 - 1.29 (m, 1 H), 0.97 (s, 9 H), 0.19 (s, 6 H);  $^{13}\text{C}$  NMR ( $\text{CDCl}_3$ , 125 MHz)  $\delta$  155.32, 140.77, 139.90, 136.98, 128.68, 127.49, 120.27, 111.97, 79.05, 45.16, 39.55, 35.11, 28.95, 25.66, 23.60, 19.95, 18.24, -4.40. HRMS calc'd for  $\text{C}_{23}\text{H}_{30}\text{OSi}$  ( $\text{M}^+ - \text{H}_2\text{O}$ ) 350.2066, found 350.2066
